# Supplementary material for: Targeting Mevalonate Pathway Enhances the efficacy of 5-Fluorouracil by regulating pyroptosis
Source: Research Square preprint supplement (doi:10.21203/rs.3.rs-5024083/v2), 2024-11-05
Supplement: Supplementary file 1 [file 135a06d7750067a7528d4b03.docx]

|  | Variable | High HMGCR  (n=31) | Low HMGCR  (n=25) | P value | t/z | Chi-Square |
| --- | --- | --- | --- | --- | --- | --- |
| **Age** | Mean±SD | 58.35±7.163 | 57.76±6.009 | 0.742 | -0.332 |  |
| **Sex** | Male  Famale | 15  16 | 15  10 | 0.386 |  | 0.750 |
| **AJCC stage** | I  II  III | 2  22  7 | 19  6  0 | <0.001 |  | 29.602 |
| **Differentiation**  **degree** | Poorly  Moderately  Well | 22  7  2 | 10  9  6 | 0.046 |  | 6.178 |
| **CA 19-9 value** | Median (IQR) | 564.4(516-671) | 350(35.65-572.4) | 0.003 | -2.992 |  |

**Supplementary Table 1.** The correlation between HMGCR level and age, sex, AJCC stage, differentiation degree, and CA19-9 value.
